# Supplementary material
Source: PubMed Central journal article supplement (PMC5470398)
Supplement: jamapsychiatry-74-456-s001.pdf [file jamapsychiatry-74-456-s001.pdf]

## Supplementary Online Content

Erlangsen A, Runeson B, Bolton JM, et al. Association between spousal suicide and mental, physical, and social health outcomes: a longitudinal and nationwide register-based study. *JAMA Psychiatry*. Published online March 22, 2017. doi:10.1001/jamapsychiatry.2017.0226

**eFigure.** Kaplan Meier Curves of the Probability of Examined Outcomes Depending on Exposure Status Among Bereaved by Suicide, Bereaved by Other Manners of Death, and Those Not Bereaved

**eTable 1.** List of Examined Outcomes

**eTable 2.** Characteristic and Distribution of the Study Population

This supplementary material has been provided by the authors to give readers additional information about their work.

**eFigure 1.** Kaplan Meier curves of the probability of examined outcomes depending on exposure status among bereaved by suicide, bereaved by other manners of death, and those not bereaved.<sup>a</sup>

**MEN<sup>b</sup>**

**A Any psychiatric diagnose**

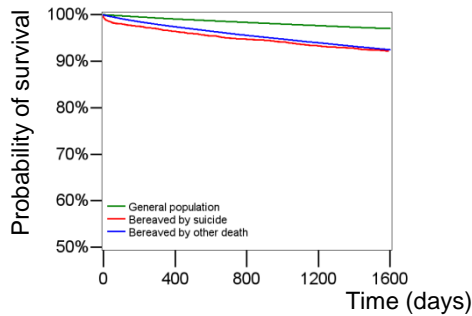

**B Mood disorders**

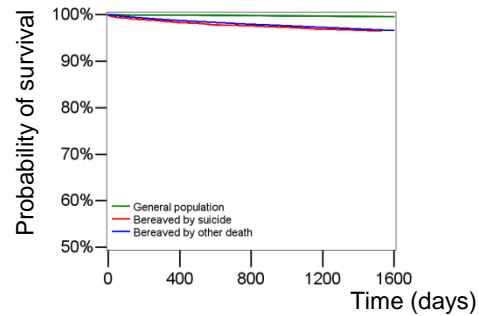

**C Alcohol use disorder**

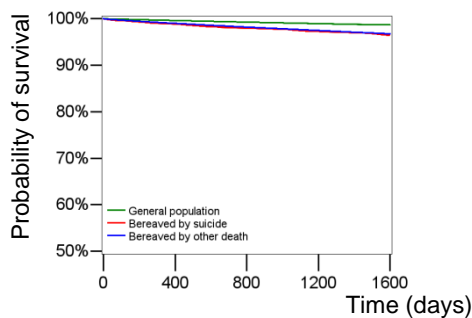

**D Prescribed antidepressants**

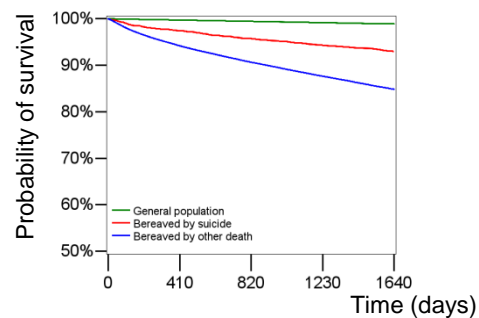

**E Deliberate self-harm**

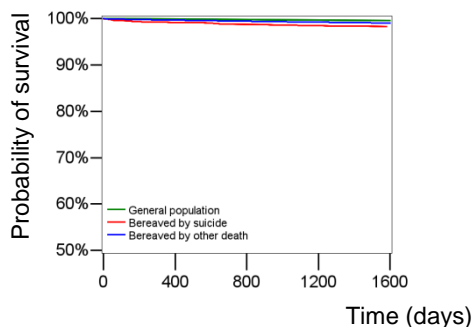

**F Cancer**

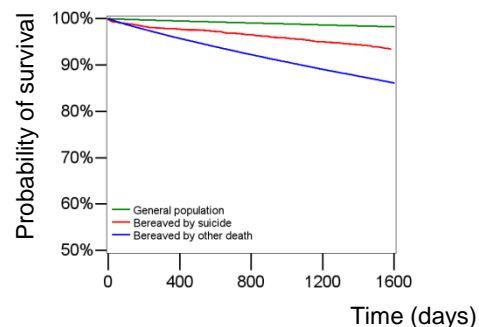

<sup>a</sup> The Kaplan Meier survival curves present the probability of survival, i.e. of not experiencing the examined outcome. Onset for people bereaved by partner's suicide or other manner of death was date of bereavement. Onset for the general population was date of entry into study. Probability estimates are unadjusted; differences between these estimates and those of the adjusted analyses are related to differences between the compared groups, such as age.

<sup>b</sup> Significance test of difference between groups: A. Any psychiatric disorder. Log rank test(2)=3,172.3, p<0.0001; B. Mood disorders. Log rank test(2)=14,721.9, p<0.0001; C. Alcohol use disorder. Log rank test(2)=587.5, p<0.0001; D. Prescribed antidepressants. Log rank test(2)=602,397.0, p<0.0001; E. Deliberate self-harm. Log rank test(2)=76.2, p<0.0001; F. Cancer. Log rank test(2)=62,830.4, p<0.0001; G. Cardiovascular diseases. Log rank test(2)=136,340.6, p<0.0001; H. Any death. Log rank test(2)=203,655.6, p<0.0001; I. Death by suicide. Log rank test(2)=1,888.8, p<0.0001; J. Sick leave. Log rank test(2)=4,831.0, p<0.0001; K. Unemployed. Log rank test(2)=116,637.4, p<0.0001; L. Somatic hospitalization. Log rank test(2)=1,440,150.1, p<0.0001; M. Psychiatric hospitalization. Log rank test(2)=599.4, p<0.0001; N. General practitioner contact. Log rank test(2)=289,112.4, p<0.0001.

**G Cardiovascular diseases**

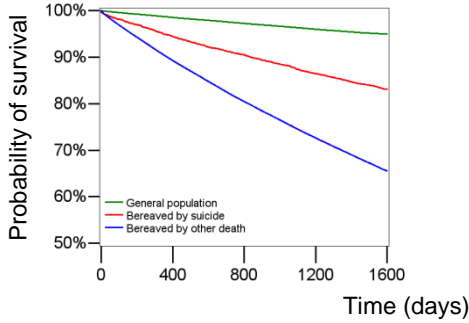

**H Any death**

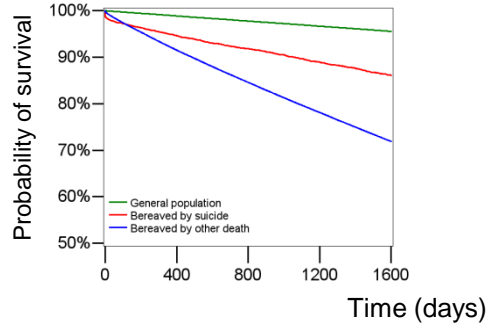

**I Death by suicide**

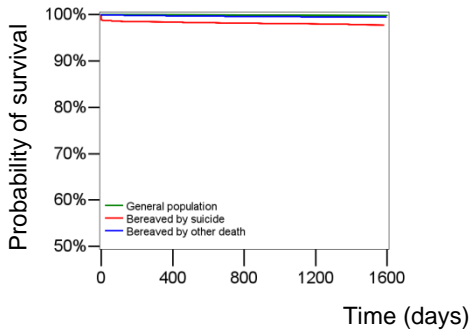

**J Sick leave**

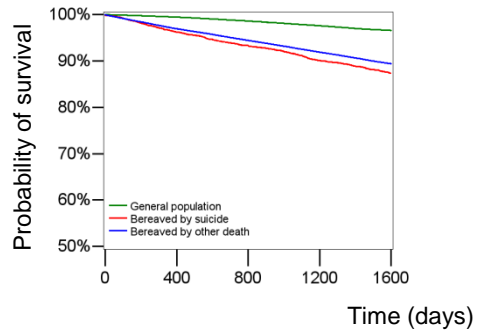

**K Unemployed**

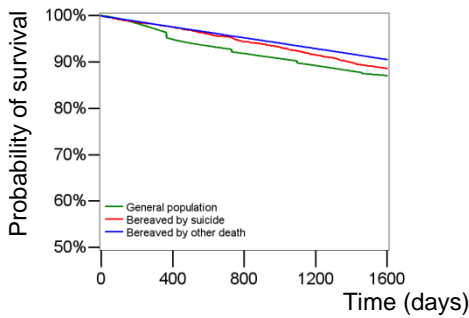

**L Somatic hospitalization**

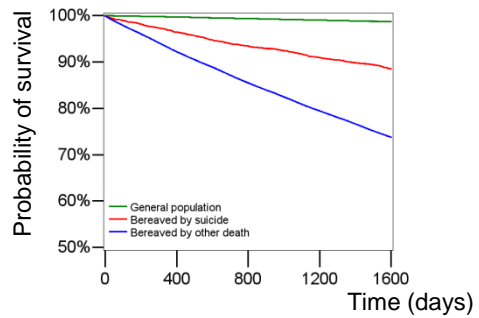

**M Psychiatric hospitalization**

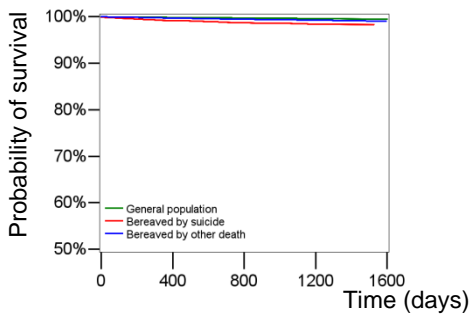

**N General practitioner contact**

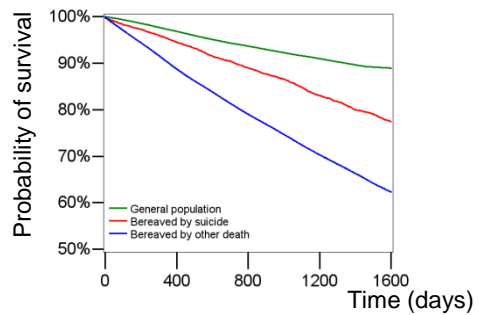

## WOMEN<sup>c</sup>

**A** Any psychiatric diagnose

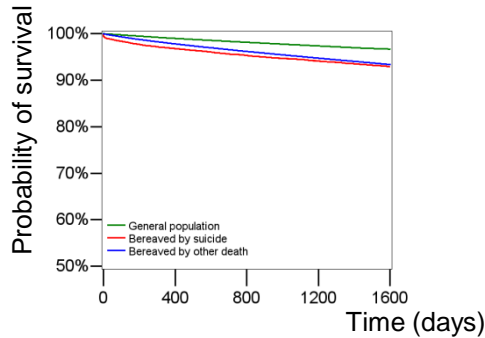

**B** Mood disorders

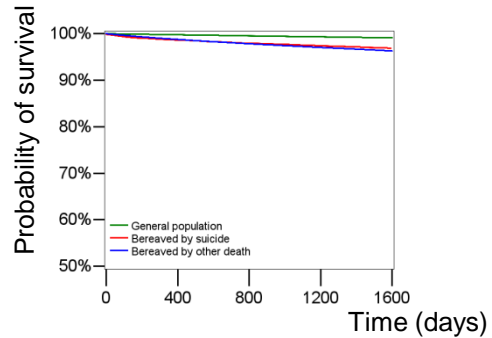

**C** Alcohol use disorder

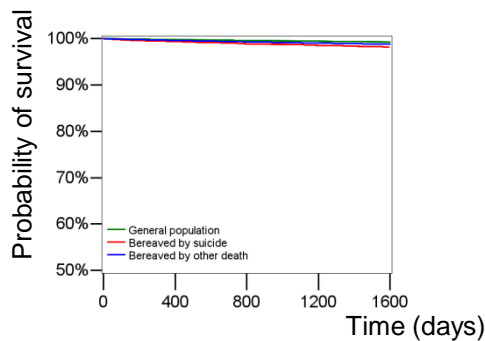

**D** Prescribed antidepressants

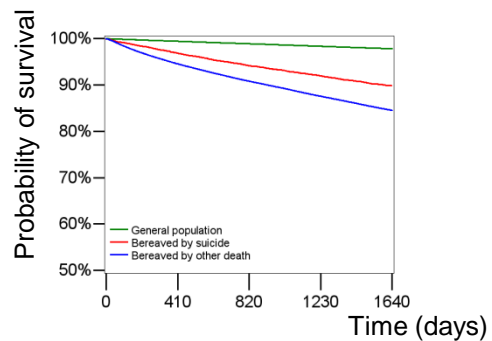

**E** Deliberate self-harm

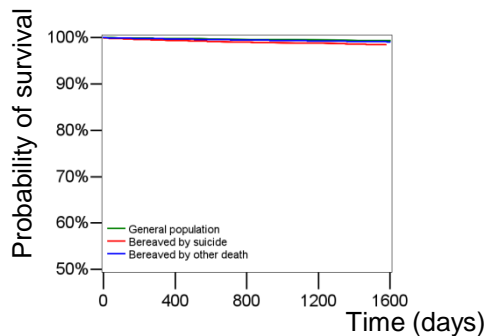

**F** Cancer

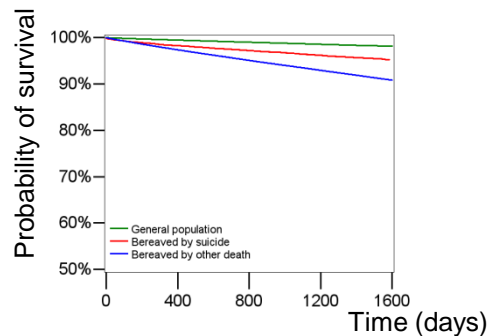

<sup>c</sup> Significance test of difference between groups: A. Any psychiatric disorder. Log rank test(2)=2,050.3,  $p < 0.0001$ ; B. Mood disorders. Log rank test(2)=11,856.5,  $p < 0.0001$ ; C. Alcohol use disorder. Log rank test(2)=97.1,  $p < 0.0001$ ; D. Prescribed antidepressants. Log rank test(2)=103,721.3,  $p < 0.0001$ ; E. Deliberate self-harm. Log rank test(2)=131.8,  $p < 0.0001$ ; F. Cancer. Log rank test(2)=41,311.6,  $p < 0.0001$ ; G. Cardiovascular diseases. Log rank test(2)=126,122.4,  $p < 0.0001$ ; H. Any death. Log rank test(2)=101,133.2,  $p < 0.0001$ ; I. Death by suicide. Log rank test(2)=982.6,  $p < 0.0001$ ; J. Sick leave. Log rank test(2)=4,880.6,  $p < 0.0001$ ; K. Unemployed. Log rank test(2)=43,122.4,  $p < 0.0001$ ; L. Somatic hospitalization. Log rank test(2)=243,702.2,  $p < 0.0001$ ; M. Psychiatric hospitalization. Log rank test(2)=233.1,  $p < 0.0001$ ; N. General practitioner contact. Log rank test(2)=29,945.3,  $p < 0.0001$ .

**G Cardiovascular diseases**

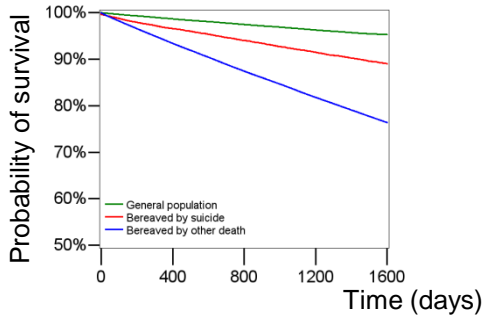

**H Any death**

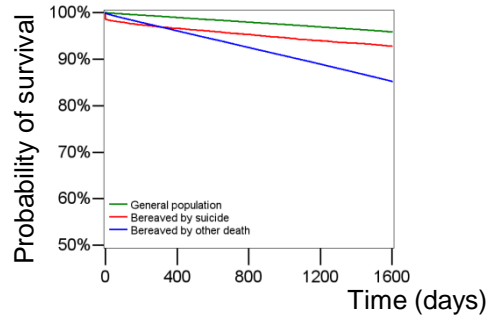

**I Death by suicide**

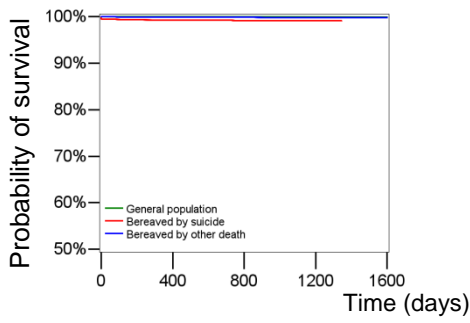

**J Sick leave**

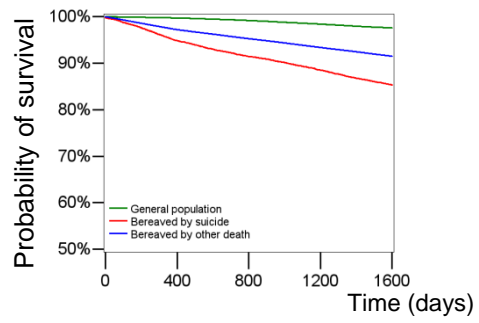

**K Unemployed**

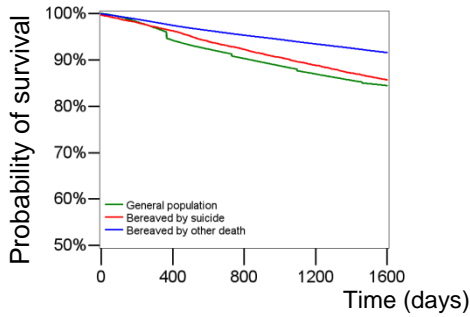

**L Somatic hospitalization**

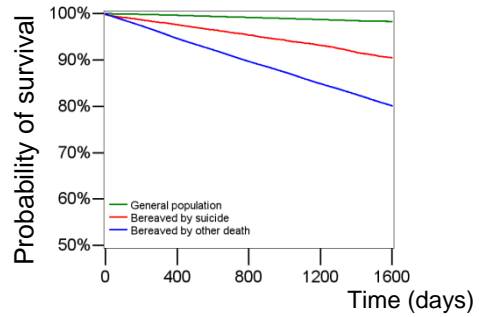

**M Psychiatric hospitalization**

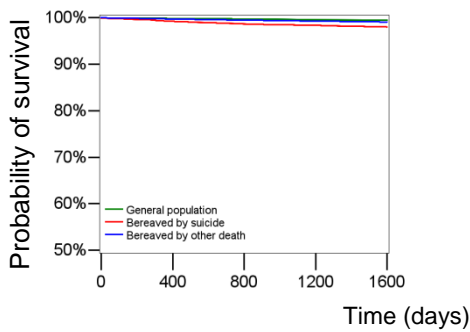

**N General practitioner contact**

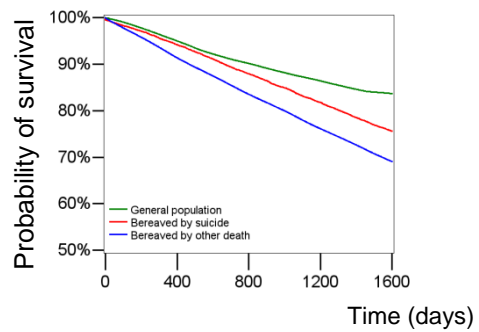

**eTable 1. List of Examined Outcomes.**

| <b>Examined outcomes</b>                                               | <b>Measured as/ ICD-codes</b>                                                                                                                                                                                                                                                                                       |
|------------------------------------------------------------------------|---------------------------------------------------------------------------------------------------------------------------------------------------------------------------------------------------------------------------------------------------------------------------------------------------------------------|
| Any psychiatric diagnosis                                              | Any diagnosis of a mental disorder made during hospital contact; ICD-8: 290-315; ICD-10: F 00-99.                                                                                                                                                                                                                   |
| Mood disorders                                                         | ICD-8: 296, 298.09, 298.19, 300.49, 301.19; ICD-10: F30-39.                                                                                                                                                                                                                                                         |
| PTSD                                                                   | ICD-10: F43.                                                                                                                                                                                                                                                                                                        |
| Anxiety disorders                                                      | ICD-8: 300; ICD-10: F40-42.                                                                                                                                                                                                                                                                                         |
| Alcohol use disorder                                                   | ICD-8: 291, 303; ICD-10: F10.                                                                                                                                                                                                                                                                                       |
| Drug use disorder                                                      | ICD-8: 304; ICD-10: F11-F19.                                                                                                                                                                                                                                                                                        |
| Prescribed antidepressants                                             | A new treatment with antidepressants (N06A) commenced after 1995 as recorded in the Danish Prescription Register.                                                                                                                                                                                                   |
| Deliberate self-harm                                                   | ICD-8: 950-950; ICD-10: X60-X84 or when data on 'reason for contact' was listed as self-harm.                                                                                                                                                                                                                       |
| Cancer                                                                 | ICD-8: 140-209 (except 172-173); ICD-10: C00-C97 (except C43-44).                                                                                                                                                                                                                                                   |
| Diabetes                                                               | ICD-8: 249- 250; ICD-10: E10, E11, E12, E13, E14, O240, O241, O242, O243.                                                                                                                                                                                                                                           |
| Sleep disorder                                                         | ICD-8: 306.4, 780.6; ICD-10: F51, G47.                                                                                                                                                                                                                                                                              |
| Cardiovascular diseases                                                | ICD-8: 390-459; ICD-10: I00-I99.                                                                                                                                                                                                                                                                                    |
| Chronic lower respiratory diseases (incl. cold and chronic bronchitis) | ICD-8: 490-4933; ICD-10: J40-47.                                                                                                                                                                                                                                                                                    |
| Liver cirrhosis                                                        | ICD-8: 571; ICD-10: K70, K73, K74.                                                                                                                                                                                                                                                                                  |
| Spinal disc herniation                                                 | ICD-8: 725; ICD-10: M50-M51.                                                                                                                                                                                                                                                                                        |
| Any death                                                              | Deaths as recorded in the Register of Causes of Death.                                                                                                                                                                                                                                                              |
| Natural death                                                          | ICD-8: 000-796; ICD-10: A00-T98.                                                                                                                                                                                                                                                                                    |
| Accident                                                               | ICD-8: E980-E949; ICD-10: V00-X59. Deaths due to undetermined causes (ICD-8: E980-E989; ICD-10:Y10-Y34) were merged with accidents due to few observations and similarity of trends.                                                                                                                                |
| Suicide                                                                | ICD-8: E950-E959; ICD-10: X60-X84 or where manner of death was recorded as 'suicide'.                                                                                                                                                                                                                               |
| Homicide                                                               | ICD-8: E960-E969; ICD-10: X85-Y09 or where manner of death was recorded as 'homicide'.                                                                                                                                                                                                                              |
| Divorce                                                                | A record of a divorce or a dissolved partnership in the Civil Registration System.                                                                                                                                                                                                                                  |
| Children placed outside the home                                       | A record of at least one child placed outside the home by the authorities in the Register of Outplaced Children and Youth (BOA).                                                                                                                                                                                    |
| Municipal family support                                               | A record of having received municipal services related to social family support, such as counselling, temporary placement outside home of child, or other supportive interventions (not including financial transfer payments). Data derived from the Register over Municipal Support to Children and Youth (BUFO). |

|                                           |                                                                                                                                                                                                                                                                       |
|-------------------------------------------|-----------------------------------------------------------------------------------------------------------------------------------------------------------------------------------------------------------------------------------------------------------------------|
| Sick leave from work                      | A record of more than 15 working days of sick leave within one calendar year in the Register on Combined Social Statistics of Statistics Denmark since 1984.                                                                                                          |
| Unemployment                              | A record of more than 25% of yearly income paid out as unemployment benefits or having received 90 days of unemployment benefits within a calendar year in the Income Statistics Register and the Combined Social Statistics of Statistics Denmark.                   |
| Disability pension                        | A record of more than 180 days on disability pension within a calendar year as registered in the Register on Combined Social Statistics and the Register over Social Pensions of Statistics Denmark since 1984.                                                       |
| Somatic hospitalization                   | A record of having been hospitalized as an inpatient for somatic disorders for more than 10 days during calendar year.                                                                                                                                                |
| Psychiatric hospitalization               | A record of having been hospitalized as an inpatient for psychiatric disorders for more than 10 days during calendar year.                                                                                                                                            |
| GP contact                                | A record of having had three or more contacts to general practitioner within a calendar year as recorded in the National Health Service Register during the period of 1990-2006 with the following codes: 8001, 8104, 8105, 8106, 8201, 8204, 8301, 8304, 8401, 8404. |
| Psychological/psychiatric therapy session | A record of having received supplement payments for psychologist or psychiatric therapy in the National Health Service Register during the period of 1990-2006 with the following codes: 2401, 2402, 24021-24029.                                                     |

**eTable 2. Characteristic and Distribution of the Study Population.**

|                                          | Bereaved by suicide |       | General population |       | Bereaved by other manners of death |       |
|------------------------------------------|---------------------|-------|--------------------|-------|------------------------------------|-------|
|                                          | Person-years        | %     | Person-years       | %     | Person-years                       | %     |
| <b>MEN</b>                               | 75,683              | 100.0 | 76,764,451         | 100.0 | 2,285,907                          | 100.0 |
| <b>Country of birth:</b>                 |                     |       |                    |       |                                    |       |
| Denmark                                  | 72,353              | 95.6  | 65,399,560         | 85.2  | 2,220,955                          | 97.2  |
| Elsewhere                                | 3,304               | 4.4   | 8,321,040          | 10.8  | 64,076                             | 2.8   |
| Missing                                  | 26                  | 0.0   | 3,043,852          | 4.0   | 876                                | 0.0   |
| <b>Age group:</b>                        |                     |       |                    |       |                                    |       |
| 18-39                                    | 4,517               | 6.0   | 33,688,888         | 43.9  | 29,943                             | 1.3   |
| 40-49                                    | 11,101              | 14.7  | 14,633,199         | 19.1  | 93,145                             | 4.1   |
| 50-59                                    | 18,626              | 24.6  | 12,010,677         | 15.6  | 245,238                            | 10.7  |
| 60-69                                    | 21,018              | 27.8  | 9,154,626          | 11.9  | 505,173                            | 22.1  |
| 70-79                                    | 14,686              | 19.4  | 5,301,650          | 6.9   | 720,614                            | 31.5  |
| 80-89                                    | 5,194               | 6.9   | 1,778,474          | 2.3   | 570,836                            | 25.0  |
| 90+                                      | 542                 | 0.7   | 196,937            | 0.3   | 120,958                            | 5.3   |
| <b>Household income level:</b>           |                     |       |                    |       |                                    |       |
| < 25%                                    | 14,877              | 19.7  | 15,597,531         | 20.3  | 756,719                            | 33.1  |
| ≥ 25%                                    | 60,566              | 80.0  | 55,090,005         | 71.8  | 1,522,141                          | 66.6  |
| Missing                                  | 239                 | 0.3   | 6,076,915          | 7.9   | 7,047                              | 0.3   |
| <b>Physical disorders:</b>               |                     |       |                    |       |                                    |       |
| yes                                      | 1,295               | 1.7   | 1,278,539          | 1.7   | 57,761                             | 2.5   |
| no                                       | 74,388              | 98.3  | 75,485,912         | 98.3  | 2,228,146                          | 97.5  |
| <b>History of psychiatric diagnosis:</b> |                     |       |                    |       |                                    |       |
| yes                                      | 1,833               | 2.4   | 1,404,840          | 1.8   | 27,785                             | 1.2   |
| no                                       | 73,850              | 97.6  | 75,359,611         | 98.2  | 2,258,121                          | 98.8  |
| <b>History of deliberate self-harm:</b>  |                     |       |                    |       |                                    |       |
| yes                                      | 414                 | 0.5   | 200,261            | 0.3   | 4,606                              | 0.2   |
| no                                       | 75,269              | 99.5  | 76,564,191         | 99.7  | 2,281,301                          | 99.8  |
| <b>WOMEN</b>                             | 184,863             | 100.0 | 74,637,221         | 100.0 | 6,396,101                          | 100.0 |
| <b>Country of birth:</b>                 |                     |       |                    |       |                                    |       |
| Denmark                                  | 177,006             | 95.7  | 64,062,006         | 85.8  | 6,144,810                          | 96.1  |
| Elsewhere                                | 7,708               | 4.2   | 7,998,785          | 10.7  | 248,663                            | 3.9   |
| Missing                                  | 149                 | 0.1   | 2,576,430          | 3.5   | 2,629                              | 0.0   |
| <b>Age group:</b>                        |                     |       |                    |       |                                    |       |
| 18-39                                    | 21,167              | 11.5  | 32,252,965         | 43.2  | 83,403                             | 1.3   |
| 40-49                                    | 35,331              | 19.1  | 13,799,791         | 18.5  | 216,024                            | 3.4   |
| 50-59                                    | 45,921              | 24.8  | 11,395,864         | 15.3  | 596,583                            | 9.3   |
| 60-69                                    | 41,848              | 22.6  | 8,774,622          | 11.8  | 1,376,881                          | 21.5  |



|                                          |         |       |            |      |           |       |
|------------------------------------------|---------|-------|------------|------|-----------|-------|
| 70-79                                    | 27,092  | 14.7  | 5,429,160  | 7.3  | 2,122,218 | 33.2  |
| 80-89                                    | 11,863  | 6.4   | 2,473,338  | 3.3  | 1,656,119 | 25.9  |
| 90+                                      | 1,642   | 0.9   | 511,481    | 0.7  | 344,872   | 5.4   |
| <b>Household income level:</b>           |         |       |            |      |           |       |
| < 25%                                    | 20,640  | 11.2  | 15,011,750 | 20.1 | 1,324,453 | 20.7  |
| ≥ 25%                                    | 163,705 | 88.6  | 53,861,672 | 72.2 | 5,054,250 | 79.0  |
| Missing                                  | 518     | 0.3   | 5,763,799  | 7.7  | 17,399    | 0.3   |
| <b>Physical disorders:</b>               |         |       |            |      |           |       |
| yes                                      | 184,860 | 100.0 | 1,081,697  | 1.4  | 6,396,066 | 100.0 |
| no                                       | 3       | 0.0   | 73,555,524 | 98.6 | 36        | 0.0   |
| <b>History of psychiatric diagnosis:</b> |         |       |            |      |           |       |
| yes                                      | 4,401   | 2.4   | 1,472,626  | 2.0  | 107,346   | 1.7   |
| no                                       | 180,462 | 97.6  | 73,164,595 | 98.0 | 6,288,755 | 98.3  |
| <b>History of deliberate self-harm:</b>  |         |       |            |      |           |       |
| yes                                      | 1,588   | 0.9   | 355,126    | 0.5  | 22,034    | 0.3   |
| no                                       | 183,275 | 99.1  | 74,282,095 | 99.5 | 6,374,067 | 99.7  |

---
